# Supplementary material for: GAGE: A critical evaluation of genome assemblies and assembly algorithms
Source: HighWire-hosted journal article supplement (doi:10.1101/gr.131383.111), 2011-12-06

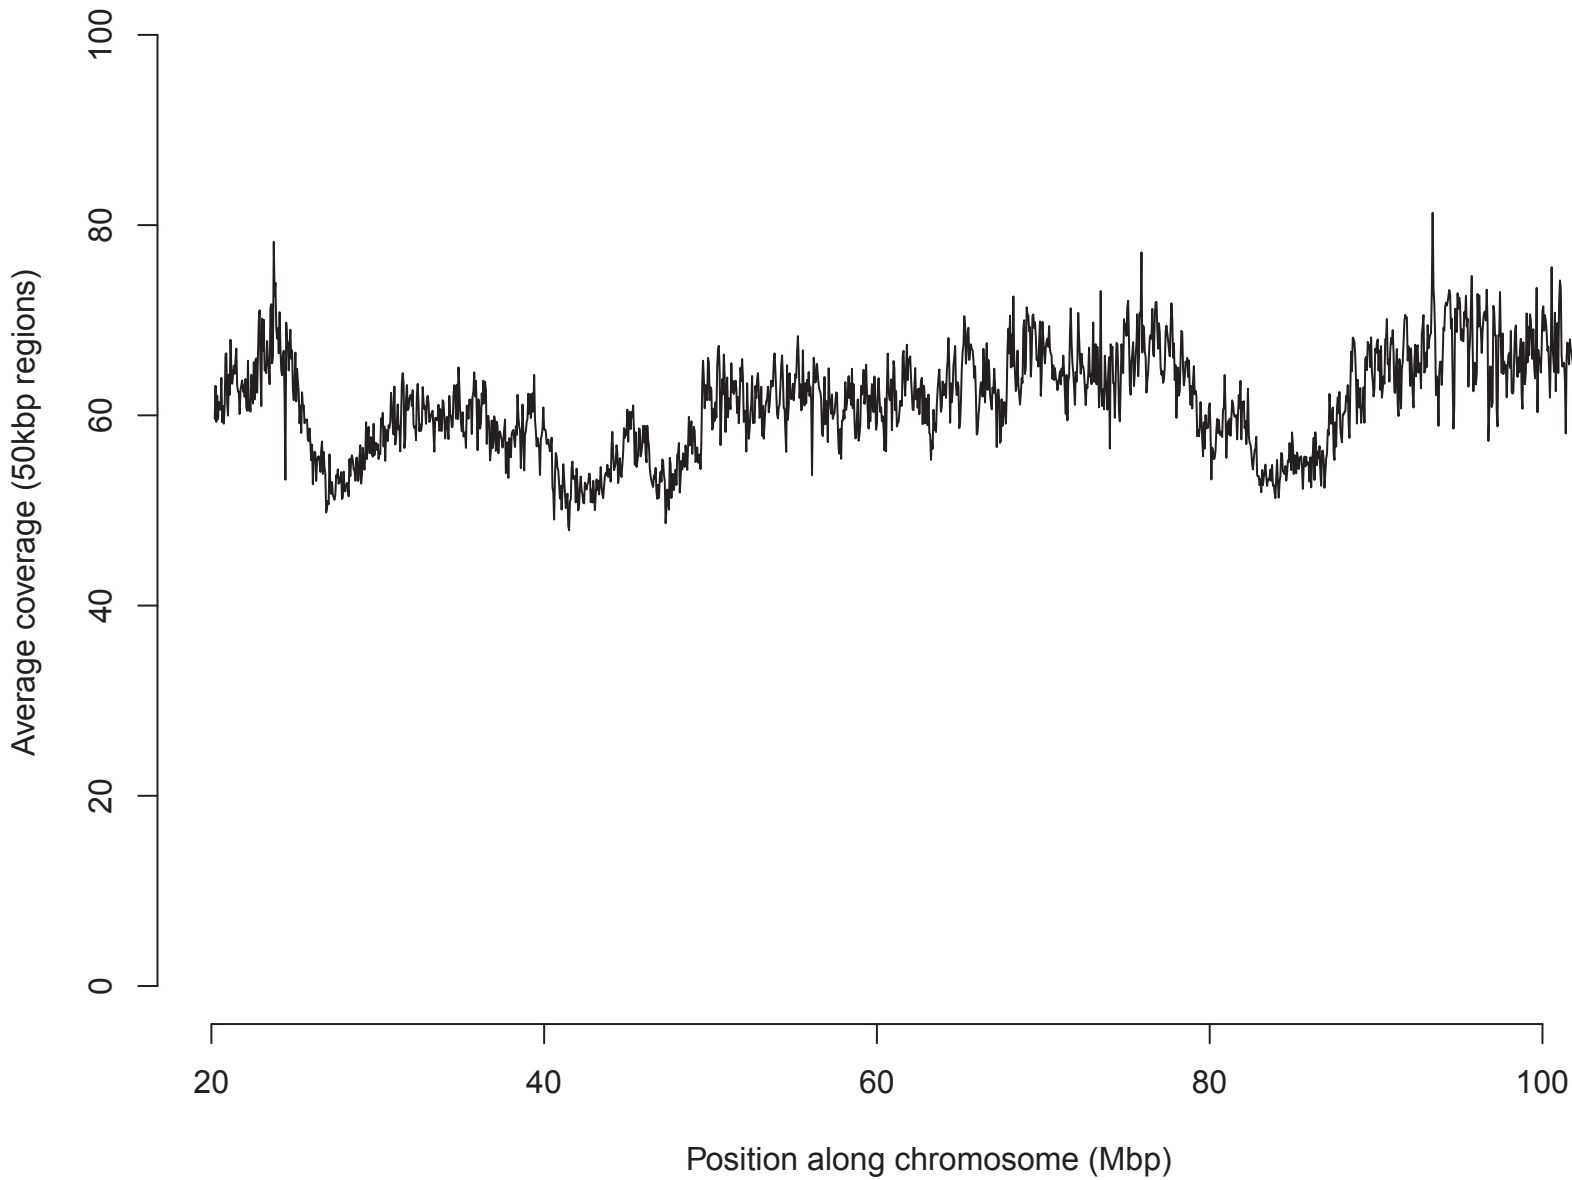

Supplement: Suppl-Figure-1-Chr14-coverage.pdf [file Suppl-Figure-1-Chr14-coverage.pdf]
