# Supplementary material for: GAGE: A critical evaluation of genome assemblies and assembly algorithms
Source: HighWire-hosted journal article supplement (doi:10.1101/gr.131383.111), 2011-12-06
Supplement: SupplementaryTable1-with-caption.pdf [file SupplementaryTable1-with-caption.pdf]

**Supplementary Table 1.** Detailed correctness analysis for all assemblies of *Staphylococcus aureus*, *Rhodobacter sphaeroides*, and human chr. 14. Column headers are as follows. Genome size: the true genome size for the bacteria, and the ungapped true genome size for human. Assembly size: the total size of all contigs >200bp. Chaff size: the size of all “chaff” contigs as defined in the main text. Contig ES: E-size of contigs as defined in the main text. Contig AES: adjusted E-size after breaking all contigs at every misjoin and every indel >5bp. Contig N50: N50 size of contigs based on known genome size. Contig AN50: Adjusted N50 size after breaking all contigs at every misjoin and every indel >5bp. Scaffold N50: N50 size of scaffolds based on known genome size. Unaligned ref bases: total number of bases from the reference for which no contig matched. Unaligned asm bases: total number of bases in the assembly that failed to align to the reference. Duplicated ref bases: total number of bases that occurred in more copies than exist in the reference. Compressed ref bases: total number of bases that occurred in too few copies in the assembly. Bad trim: total number of bases on the ends of contigs that fail to match the reference. SNPs: single nucleotide polymorphisms, i.e., one-base mismatches compared to the reference. Indels: insertions and deletions with respect to the reference. Misjoins: locations where two adjacent sequences in the assembly should be split apart and placed at distinct locations in order to match the reference. Inversion: a misjoin where a segment needs to be flipped to match the reference. Relocation: a misjoin where a segment needs to be moved elsewhere on the chromosome. Translocation: a misjoin where a segment needs to be moved to another chromosome. Note that human chromosome 14, as a single chromosome, could not yield any translocations. *S. aureus* has 2 small plasmids and one large chromosome. *Rhodobacter* has 2 chromosomes plus 5 plasmids.

| Assembly              | Genome size | Assembly size | Chaff size | Contig  |         | Contig |        | Scaffold |        | Unaligned ref bases | Unaligned asin bases | Duplicated ref bases | Compressed ref bases | Bad Average | Indels   | Contigs |        |         |         | Scaffolds  |               |        |           |                  |               |      |      |     |      |   |      |      |      |   |   |
|-----------------------|-------------|---------------|------------|---------|---------|--------|--------|----------|--------|---------------------|----------------------|----------------------|----------------------|-------------|----------|---------|--------|---------|---------|------------|---------------|--------|-----------|------------------|---------------|------|------|-----|------|---|------|------|------|---|---|
|                       |             |               |            | ES      | AS      | MSD    | ANSO   | MSD      | ANSO   |                     |                      |                      |                      |             |          | MSD     | ANSO   | Highly  | Everson | Relocation | Translocation | Total  | Inversion | Indel/Relocation | Translocation |      |      |     |      |   |      |      |      |   |   |
| <b>S. aureus</b>      |             |               |            |         |         |        |        |          |        |                     |                      |                      |                      |             |          |         |        |         |         |            |               |        |           |                  |               |      |      |     |      |   |      |      |      |   |   |
| ATCC                  | 2901081     | 3847346       | 125.64%    | 189957  | 6.54%   | 43124  | 114023 | 72.82%   | 29198  | 24819               | 83.00%               | 34376                | 77917                | 81.48%      | 39428    | 1.36%   | 170    | 669882  | 23.06%  | 28367      | 0.98%         | 53     | 99.97     | 258              | 20            | 9    | 5    | 3   | 2    | - | 1    | 1    | 0    | - |   |
| ALPATHS-LG            | 2901081     | 2899869       | 98.86%     | 907     | 0.03%   | 110936 | 50078  | 81.20%   | 96740  | 66230               | 68.46%               | 1091731              | 1091731              | 100.00%     | 17946    | 0.52%   | 189    | 792     | 0.03%   | 36005      | 1.26%         | 161    | 99.99     | 79               | 4             | 12   | 4    | 0   | 4    | - | 0    | 0    | 0    | - |   |
| BamBuz                | 2901081     | 2833735       | 97.61%     | 0       | 0.00%   | 60996  | 19610  | 28.38%   | 50192  | 45701               | 31.28%               | 1083792              | 1083792              | 100.00%     | 37383    | 1.30%   | 43     | 171     | 0.01%   | 36961      | 1.27%         | 9      | 99.99     | 28               | 56            | 164  | 13   | 2   | 11   | - | 0    | 0    | 0    | - |   |
| MSR-CA                | 2901081     | 2862000       | 98.58%     | 552     | 0.02%   | 60448  | 50381  | 83.35%   | 99152  | 48234               | 81.54%               | 2411914              | 1021905              | 42.37%      | 37340    | 1.29%   | 27     | 23895   | 0.82%   | 28896      | 1.00%         | 27     | 99.97     | 191              | 23            | 10   | 12   | 6   | 6    | - | 3    | 3    | 0    | - |   |
| SGA                   | 2901081     | 2833736       | 97.61%     | 614338  | 21.16%  | 4726   | 4712   | 99.69%   | 4005   | 3995                | 99.75%               | -                    | -                    | -           | 54955    | 1.89%   | 136    | 850     | 0.03%   | 37211      | 1.28%         | 108    | 100       | 32               | 2             | 2    | 4    | 1   | 3    | - | -    | -    | -    | - |   |
| SOApendov             | 2901081     | 2909124       | 100.21%    | 10156   | 0.35%   | 232352 | 88802  | 26.95%   | 288184 | 62681               | 21.75%               | 331598               | 284904               | 85.67%      | 10839    | 0.37%   | 315    | 41277   | 1.42%   | 40437      | 1.39%         | 284    | 99.96     | 246              | 25            | 31   | 17   | 1   | 16   | - | 8    | 1    | 7    | - |   |
| Velvet                | 2901081     | 2847738       | 98.08%     | 12971   | 0.45%   | 60234  | 48511  | 89.42%   | 48440  | 21460               | 85.61%               | 762333               | 126167               | 16.52%      | 23068    | 0.78%   | 894    | 7899    | 0.19%   | 36772      | 1.27%         | 144    | 99.98     | 217              | 6             | 14   | 14   | 5   | 9    | - | 17   | 5    | 12   | - |   |
| <b>S. pharaonides</b> |             |               |            |         |         |        |        |          |        |                     |                      |                      |                      |             |          |         |        |         |         |            |               |        |           |                  |               |      |      |     |      |   |      |      |      |   |   |
| ATCC                  | 4601060     | 4669251       | 107.96%    | 76138   | 1.65%   | 9356   | 6877   | 73.51%   | 5872   | 4213                | 71.85%               | 8859                 | 4599                 | 51.91%      | 118484   | 1.01%   | 6355   | 462897  | 10.94%  | 20134      | 0.44%         | 6678   | 99.97     | 692              | 288           | 34   | 21   | 2   | 14   | 5 | 3    | 0    | 1    | 0 |   |
| ALPATHS-LG            | 4601060     | 4587828       | 99.84%     | 548     | 0.01%   | 44816  | 35973  | 89.59%   | 42455  | 34424               | 81.09%               | 2192334              | 2192334              | 100.00%     | 21664    | 0.47%   | 444    | 17262   | 0.38%   | 13816      | 0.30%         | 60     | 99.98     | 218              | 150           | 37   | 6    | 0   | 3    | 3 | 0    | 0    | 0    | 0 | - |
| BamBuz                | 4601060     | 4371571       | 94.97%     | 0       | 0.00%   | 94521  | 14281  | 17.22%   | 93198  | 12781               | 13.72%               | 2438507              | 2418500              | 99.18%      | 224768   | 4.93%   | 211    | 1749    | 0.05%   | 10963      | 0.24%         | 78     | 99.99     | 189              | 149           | 363  | 5    | 0   | 3    | 2 | 2    | 0    | 0    | 1 | 1 |
| CABOG                 | 4601060     | 4238067       | 92.07%     | 125     | 0.00%   | 24066  | 21539  | 89.50%   | 20211  | 17968               | 88.41%               | 65690                | 5312                 | 84.20%      | 244543   | 7.50%   | 526    | 6478    | 0.14%   | 23050      | 0.70%         | 483    | 99.96     | 536              | 145           | 24   | 10   | 1   | 2    | 7 | 5    | 4    | 0    | 1 | - |
| MSR-CA                | 4601060     | 4465002       | 97.00%     | 830     | 0.02%   | 24214  | 21579  | 89.12%   | 22128  | 19985               | 86.25%               | 2975004              | 2967689              | 99.74%      | 161815   | 1.52%   | 1775   | 47991   | 1.04%   | 22341      | 0.49%         | 1658   | 99.97     | 807              | 179           | 32   | 10   | 1   | 5    | 4 | 5    | 2    | 0    | 3 | 0 |
| SGA                   | 4601060     | 4502862       | 97.82%     | 22778   | 4.90%   | 4078   | 4061   | 99.79%   | 2861   | 2854                | 99.76%               | -                    | -                    | -           | 106250   | 2.11%   | 871    | 2740    | 0.08%   | 42285      | 0.92%         | 856    | 99.99     | 338              | 118           | 4    | 4    | 0   | 2    | 2 | -    | -    | -    | - | - |
| SOApendov             | 4601060     | 4596074       | 99.85%     | 20523   | 0.45%   | 157153 | 18553  | 11.81%   | 131681 | 14340               | 10.89%               | 666165               | 657636               | 99.62%      | 40615    | 0.88%   | 481    | 40134   | 1.07%   | 23493      | 0.51%         | 121    | 99.97     | 527              | 155           | 406  | 8    | 0   | 4    | 4 | 3    | 0    | 1    | 2 | 0 |
| Velvet                | 4601060     | 4503268       | 97.83%     | 24985   | 0.54%   | 18552  | 16731  | 90.08%   | 15652  | 14482               | 92.45%               | 353027               | 270086               | 76.51%      | 73852    | 1.60%   | 316    | 13176   | 0.29%   | 42569      | 0.92%         | 193    | 99.98     | 413              | 148           | 27   | 8    | 0   | 6    | 2 | 19   | 6    | 6    | 2 | 7 |
| <b>S. maritimus</b>   |             |               |            |         |         |        |        |          |        |                     |                      |                      |                      |             |          |         |        |         |         |            |               |        |           |                  |               |      |      |     |      |   |      |      |      |   |   |
| ATCC                  | 88289540    | 73341066      | 83.07%     | 3652835 | 41.37%  | 3291   | 3134   | 95.23%   | 2024   | 1956                | 96.64%               | 2129                 | 2039                 | 94.83%      | 1569432  | 17.78%  | 27144  | 520979  | 0.59%   | 460918     | 0.52%         | 14752  | 99.9      | 60488            | 9987          | 678  | 13   | 6   | 7    | - | 9    | 9    | 0    | - |   |
| ALPATHS-LG            | 88289540    | 84436099      | 95.63%     | 2366    | 0.00%   | 47031  | 57749  | 57.74%   | 36530  | 21042               | 57.61%               | 8164636              | 4702139              | 5.76%       | 2440622  | 2.76%   | 30060  | 238667  | 0.27%   | 2269633    | 2.57%         | 18473  | 99.84     | 53317            | 27559         | 2598 | 101  | 44  | 57   | - | 45   | 0    | 45   | - |   |
| BamBuz                | 88289540    | 68248005      | 77.29%     | 153     | 0.00%   | 23291  | 15461  | 27.24%   | 3851   | 4322                | 73.87%               | 242089               | 164446               | 69.28%      | 18139626 | 20.53%  | 60387  | 127459  | 0.14%   | 3568313    | 4.04%         | 43775  | 99.86     | 64869            | 17141         | 5411 | 3366 | 172 | 1544 | - | 143  | 37   | 106  | - |   |
| CABOG                 | 88289540    | 8623273       | 97.67%     | 24446   | 0.03%   | 98793  | 30689  | 53.20%   | 46356  | 23707               | 52.29%               | 392605               | 25992                | 6.59%       | 1487019  | 1.68%   | 54956  | 139908  | 0.16%   | 1509716    | 1.71%         | 20823  | 99.85     | 8126             | 28420         | 2883 | 149  | 46  | 103  | - | 597  | 389  | 208  | - |   |
| MSR-CA                | 88289540    | 83291273      | 94.34%     | 289271  | 3.33%   | 6762   | 5927   | 87.66%   | 4906   | 4247                | 88.61%               | 893428               | 89668                | 10.48%      | 5307963  | 6.01%   | 550163 | 1499562 | 1.43%   | 2218738    | 2.51%         | 349266 | 99.71     | 142268           | 21800         | 2161 | 1374 | 811 | 93   | - | 1668 | 210  | 858  | - |   |
| SGA                   | 88289540    | 82375466      | 93.30%     | 9515354 | 107.82% | 3795   | 3771   | 98.49%   | 2710   | 2671                | 98.56%               | -                    | -                    | -           | 6158062  | 9.97%   | 53663  | 135547  | 0.14%   | 1888332    | 2.14%         | 32693  | 99.89     | 7076             | 15483         | 681  | 150  | 90  | 60   | - | 268  | 17   | 251  | - |   |
| SOApendov             | 88289540    | 9260368       | 104.89%    | 3331511 | 3.77%   | 33023  | 38801  | 50.98%   | 14724  | 7442                | 50.54%               | 455068               | 214392               | 47.11%      | 1619458  | 18.03%  | 527247 | 996461  | 6.76%   | 3319777    | 3.79%         | 317934 | 99.81     | 88165            | 23147         | 2902 | 1061 | 520 | 741  | - | 389  | 199  | 170  | - |   |
| Velvet                | 88289540    | 74740589      | 84.65%     | 5519204 | 6.25%   | 3276   | 3049   | 93.09%   | 2294   | 2139                | 93.24%               | 1190421              | 27052                | 2.27%       | 1348795  | 15.12%  | 273461 | 83574   | 0.04%   | 568790     | 0.64%         | 89590  | 99.86     | 79399            | 17505         | 4172 | 268  | 199 | 170  | - | 9156 | 3824 | 5332 | - |   |
